# Supplementary material for: (C3N6H7)2SiF6·H2O: an ultraviolet birefringent crystal exceeding the intrinsic energy gap of an organic reagent
Source: Royal Society of Chemistry journal article supplement (doi:10.1039/d2qi01592g), 2022-01-01
Supplement: d2qi01592g1.pdf [file d2qi01592g1.pdf]

# Electronic Supplementary Information

## **(C<sub>3</sub>N<sub>6</sub>H<sub>7</sub>)<sub>2</sub>SiF<sub>6</sub>·H<sub>2</sub>O: an ultraviolet birefringent crystal exceeding the intrinsic energy gap of an organic reagent**

Yaoguo Shen,<sup>\*a</sup> Yingwu Zhou,<sup>a</sup> Xiaoling Xue,<sup>a</sup> Hualiang Yu,<sup>a</sup> Sangen Zhao<sup>b</sup> and Junhua Luo<sup>b</sup>

### Contents

|                                                                                                                                                                           |     |
|---------------------------------------------------------------------------------------------------------------------------------------------------------------------------|-----|
| Synthesis of (C <sub>3</sub> N <sub>6</sub> H <sub>7</sub> ) <sub>2</sub> SiF <sub>6</sub> ·H <sub>2</sub> O ( <b>1</b> ).....                                            | S2  |
| Single-Crystal Structure Determination.....                                                                                                                               | S2  |
| Thermal Stability Analysis.....                                                                                                                                           | S2  |
| UV-Vis-NIR Diffuse Reflectance Spectroscopy .....                                                                                                                         | S3  |
| Infrared Spectroscopy .....                                                                                                                                               | S3  |
| Computational Methods.....                                                                                                                                                | S3  |
| Figure S1. (a) One C <sub>3</sub> N <sub>6</sub> H <sub>6</sub> molecule. (b) Arrangement of C <sub>3</sub> N <sub>6</sub> H <sub>6</sub> molecules in the melamine. .... | S4  |
| Figure S2. Thermal stability analysis for <b>1</b> . ....                                                                                                                 | S4  |
| Figure S3. Infrared spectrum of <b>1</b> . ....                                                                                                                           | S5  |
| Figure S4. Density of states for melamine. ....                                                                                                                           | S5  |
| Table S1. Crystal Data and Structural Refinement for (C <sub>3</sub> N <sub>6</sub> H <sub>7</sub> ) <sub>2</sub> SiF <sub>6</sub> ·H <sub>2</sub> O. ....                | S6  |
| Table S2. The Fractional Atomic Coordinates and Equivalent Isotropic Displacement Parameters. ....                                                                        | S7  |
| Table S3. Anisotropic Displacement Parameters. ....                                                                                                                       | S8  |
| Table S4. Bond Lengths for (C <sub>3</sub> N <sub>6</sub> H <sub>7</sub> ) <sub>2</sub> SiF <sub>6</sub> ·H <sub>2</sub> O.....                                           | S9  |
| Table S5. Bond Angles for (C <sub>3</sub> N <sub>6</sub> H <sub>7</sub> ) <sub>2</sub> SiF <sub>6</sub> ·H <sub>2</sub> O. ....                                           | S9  |
| Table S6. Hydrogen Bonds for (C <sub>3</sub> N <sub>6</sub> H <sub>7</sub> ) <sub>2</sub> SiF <sub>6</sub> ·H <sub>2</sub> O.....                                         | S10 |
| References.....                                                                                                                                                           | S11 |

---

<sup>a</sup> College of Physics and Electronic Information Engineering, Minjiang University, Fuzhou, Fujian 350108, China. Email: shenyg@mju.edu.cn

<sup>b</sup> State Key Laboratory of Structural Chemistry, Fujian Institute of Research on the Structure of Matter, Chinese Academy of Sciences, Fuzhou, Fujian 350002, China

## Reagents

$C_3N_6H_3$  (99%) and  $SbF_3$  (98%) were purchased from Aladdin and used as received. The high borosilicate glass beaker is a necessary condition for the synthesis of target compound, because it can provide Si-based raw materials.

## Synthesis of $(C_3N_6H_7)_2SiF_6 \cdot H_2O$ (**1**)

Crystals of **1** were synthesized by a simple evaporation technique of aqueous solution. The raw reactants of  $C_3N_6H_3$  (0.126 g, 1 mmol) and  $SbF_3$  (0.179 g, 1 mmol) were mixed together with deionized water (50 mL) in a high borosilicate glass beaker. The solution was stirred with a magnetic mixer for 30 minutes, and then filtered through a filter paper to obtain a clear, transparent liquid. The beaker was sealed with perforated plastic wrap and left to stand at room temperature for about 10 days. Curiously, colorless block crystals were attached to the wall of the glass beaker. Did the reactant react with the beaker? The structural determination confirmed our suspicions. The purity of the obtained product is confirmed by the powder X-ray diffraction (XRD) patterns, which were taken on a Rigaku MiniFlex II diffractometer (Cu  $K\alpha$  radiation) in the range of  $2\theta = 5^\circ\text{--}60^\circ$  with a step width of  $0.01^\circ$  and a sampling rate of  $1^\circ \text{min}^{-1}$ . The results agree well with the calculated XRD patterns from single-crystal XRD analysis (Figure 2a).

## Single-Crystal Structure Determination

A colorless **1** crystal ( $0.12 \times 0.11 \times 0.10 \text{ mm}^3$ ) was selected using an optical microscope for single-crystal XRD analysis. The diffraction data were collected by using graphite-monochromatized Mo  $K\alpha$  radiation ( $\lambda = 0.71073 \text{ \AA}$ ) at 297.14 (10) K on a ROD Synergy Custom DW system with a Hybrid Pixel Array Detector. The collection of the intensity data, cell refinement, and data reduction were carried out with the program CrysAlisPro.<sup>1</sup> Using Olex2,<sup>2-3</sup> the structure was solved with SHELXT structure solution program using Intrinsic Phasing and refined with the SHELXL<sup>4</sup> refinement package using Least Squares minimisation. Initially, we set the heavy Q peak to 'Sb' element, two anomalies occur: (1) most atoms are not positive definite. (2) The Sb–F bond lengths fall in the range of 1.66–1.67 Å, which much shorter than the reported value of about 1.92 Å. Therefore, other impurity should be introduced in the reaction solution. It can be speculated that the heavy Q peak may be Si based on the fact that the beaker is made up of high borosilicate glass. When the heavy Q peak is set to 'Si' element, the structure is reasonable after several rounds of refinement. Details of crystal parameters, data collection, and structure refinement are summarized in Table S1. The atomic coordinates and equivalent isotropic displacement parameters are listed in Table S2, and the anisotropic displacement parameters are listed in Table S3. The selected bond distances and angles are presented in Table S4–S5. Hydrogen bonds are listed in Table S6.

## Thermal Stability Analysis

The thermogravimetric (TG) and differential thermal analysis (DTA) of **1** was carried out on a NETZSCH STA 449F3 simultaneous analyzer. About 6.372 mg of **1** was placed in  $Al_2O_3$  crucibles, heated at a rate of  $15 \text{ }^\circ\text{C min}^{-1}$  from room temperature to  $900 \text{ }^\circ\text{C}$  under flowing nitrogen.

## UV-Vis-NIR Diffuse Reflectance Spectroscopy

The UV-Vis-NIR diffuse reflection data were collected on a PerkinElmer Lambda-1050 UV/vis/NIR spectrophotometer. A whiteboard provided by the merchant was used as a reference (100% reflectance) in the range from 220 nm to 800 nm.

### **Infrared Spectroscopy**

Infrared spectrum was measured on a Nicolet iS50FT-IR spectrometer with KBr pellets as a standard in the range of 4000~400  $\text{cm}^{-1}$ . The mixture of **1** and dried KBr (mass ratio = 1:100) was ground thoroughly in an agate mortar, and then pressed into a thin slice for measurement.

### **Computational Methods**

The first-principles calculations for **1** were performed by CASTEP<sup>5</sup> on a plane-wave pseudopotential total energy package based density functional theory (DFT).<sup>6</sup> The functional developed by Perdew-Burke-Ernzerhof (PBE) functional within the generalized gradient approximation (GGA)<sup>7-8</sup> form was adopted to describe the exchange-correlation energy. The ultrasoft pseudopotentials were used to model the effective interaction between atom cores and valence electrons. H 1s<sup>1</sup>, C 2s<sup>2</sup>2p<sup>2</sup>, N 2s<sup>2</sup>2p<sup>3</sup>, O 2s<sup>2</sup>2p<sup>4</sup>, F 2s<sup>2</sup>2p<sup>5</sup> and Si 3s<sup>2</sup>3p<sup>2</sup> electrons were treated as valence electrons. The kinetic energy cutoff of 380 eV (for **1**), 310 eV (for melamine) and dense  $2 \times 1 \times 1$  (for **1**),  $1 \times 2 \times 2$  (for melamine) Monkhorst-Pack<sup>9</sup> k-point meshes in the Brillouin zones were chosen. The linear optical properties were examined based on the dielectric function  $\varepsilon(\omega) = \varepsilon_1(\omega) + i\varepsilon_2(\omega)$ . The imaginary part of dielectric function  $\varepsilon_2$  can be calculated based on the electronic structures and the real part is obtained by the Kramers-Kronig transformation, accordingly the refractive indices and the birefringence ( $\Delta n$ ) can be calculated. The frequency-dependent refractive indices were calculated to demonstrate the validity of birefringence measurements.

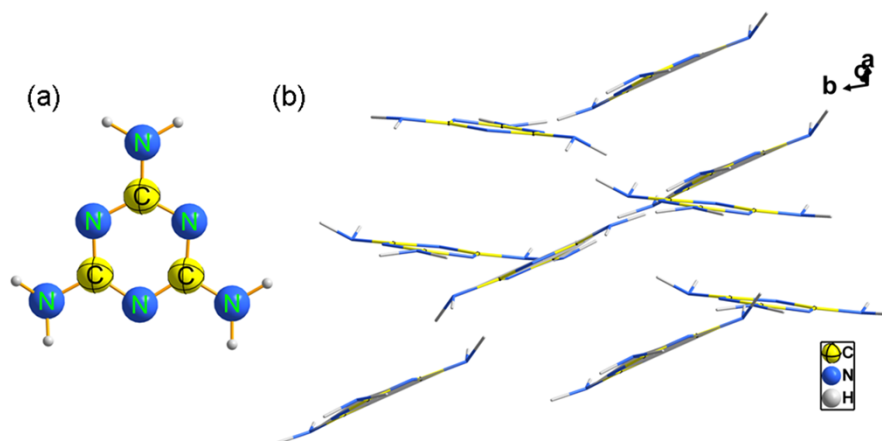

**Figure S1.** (a) One  $C_3N_6H_6$  molecule. (b) Arrangement of  $C_3N_6H_6$  molecules in the melamine.

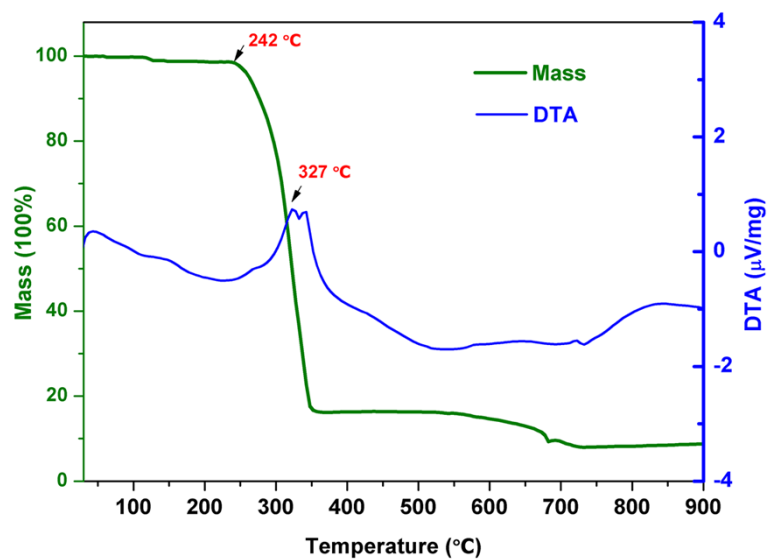

**Figure S2.** Thermal stability analysis for **1**.

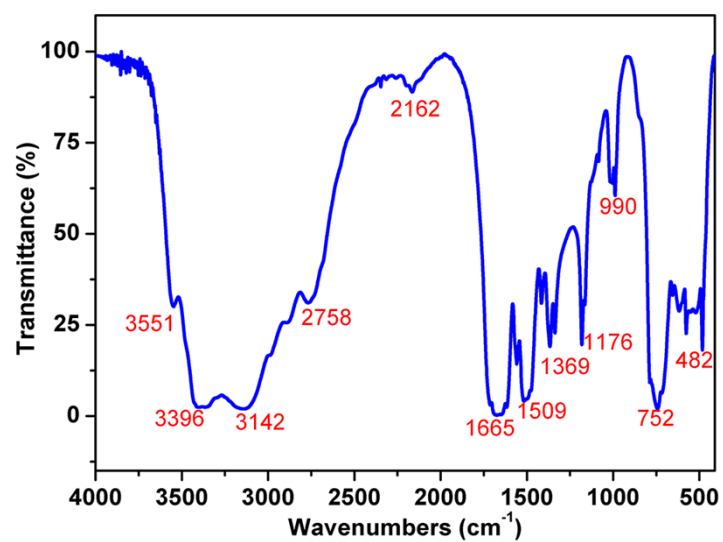

Figure S3. Infrared spectrum of 1.

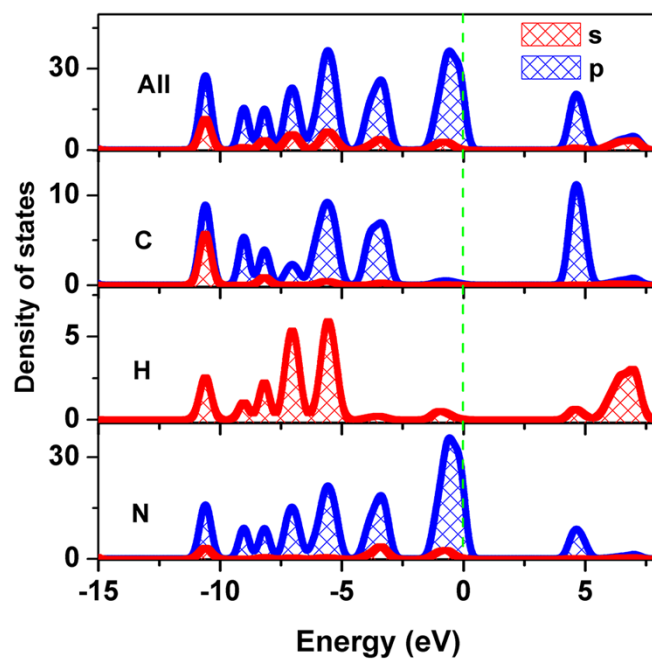

Figure S4. Density of states for melamine.

**Table S1. Crystal Data and Structural Refinement for (C<sub>3</sub>N<sub>6</sub>H<sub>7</sub>)<sub>2</sub>SiF<sub>6</sub>·H<sub>2</sub>O.**

|                                                               |                                                                              |
|---------------------------------------------------------------|------------------------------------------------------------------------------|
| Empirical formula                                             | C <sub>6</sub> H <sub>16</sub> N <sub>12</sub> OSiF <sub>6</sub>             |
| Formula weight                                                | 414.40                                                                       |
| Temperature/K                                                 | 297.14(10)                                                                   |
| Crystal system                                                | monoclinic                                                                   |
| Space group                                                   | <i>P</i> 2 <sub>1</sub> / <i>n</i>                                           |
| <i>a</i> /Å                                                   | 7.7315(3)                                                                    |
| <i>b</i> /Å                                                   | 10.8592(3)                                                                   |
| <i>c</i> /Å                                                   | 17.9424(6)                                                                   |
| $\alpha$ /°                                                   | 90                                                                           |
| $\beta$ /°                                                    | 91.245(3)                                                                    |
| $\gamma$ /°                                                   | 90                                                                           |
| Volume/Å <sup>3</sup>                                         | 1506.05(9)                                                                   |
| <i>Z</i>                                                      | 4                                                                            |
| $\rho_{\text{calc}}$ g/cm <sup>3</sup>                        | 1.828                                                                        |
| $\mu$ /mm <sup>-1</sup>                                       | 0.256                                                                        |
| <i>F</i> (000)                                                | 848.0                                                                        |
| Crystal size/mm <sup>3</sup>                                  | 0.12 × 0.11 × 0.1                                                            |
| Radiation                                                     | Mo K $\alpha$ ( $\lambda$ = 0.71073 Å)                                       |
| 2 $\Theta$ range for data collection/°                        | 4.384 to 58.662                                                              |
| Index ranges                                                  | -9 ≤ <i>h</i> ≤ 9, -13 ≤ <i>k</i> ≤ 12, -22 ≤ <i>l</i> ≤ 19                  |
| Reflections collected                                         | 10674                                                                        |
| Independent reflections                                       | 3275 [ <i>R</i> <sub>int</sub> = 0.0190, <i>R</i> <sub>sigma</sub> = 0.0222] |
| Data/restraints/parameters                                    | 3275/5/251                                                                   |
| Goodness-of-fit on <i>F</i> <sup>2</sup>                      | 1.061                                                                        |
| Final <i>R</i> indexes [ <i>I</i> >= 2 $\sigma$ ( <i>I</i> )] | <i>R</i> <sub>1</sub> = 0.0416, <i>wR</i> <sub>2</sub> = 0.1134              |
| Final <i>R</i> indexes [all data]                             | <i>R</i> <sub>1</sub> = 0.0512, <i>wR</i> <sub>2</sub> = 0.1205              |

**Table S2. The Fractional Atomic Coordinates ( $\times 10^4$ ) and Equivalent Isotropic Displacement Parameters ( $\text{\AA}^2 \times 10^3$ ) for  $(\text{C}_3\text{N}_6\text{H}_7)_2\text{SiF}_6 \cdot \text{H}_2\text{O}$ .  $U_{\text{eq}}$  is defined as 1/3 of the trace of the orthogonalised  $U_{\text{ij}}$  tensor.**

| Atom | x          | y           | z          | U(eq)     |
|------|------------|-------------|------------|-----------|
| Si1  | 5342.1(6)  | 4975.8(4)   | 7581.4(3)  | 27.15(16) |
| F1   | 4306.4(19) | 3725.2(11)  | 7890.7(9)  | 58.0(4)   |
| F2   | 5378(2)    | 4350.8(14)  | 6732.3(8)  | 62.4(4)   |
| F3   | 3425.9(16) | 5631.6(11)  | 7384.8(8)  | 50.2(4)   |
| F4   | 6340.6(19) | 6237.9(13)  | 7283.7(8)  | 59.9(4)   |
| F5   | 5317(2)    | 5563.2(12)  | 8445.2(7)  | 53.9(4)   |
| F6   | 7237.1(16) | 4311.7(14)  | 7774.2(9)  | 64.9(5)   |
| O1   | 1204(2)    | 3212.9(15)  | 7195.0(10) | 52.3(5)   |
| N1   | 4333(2)    | -2386.5(14) | 5975.4(9)  | 36.3(4)   |
| N2   | 2959(2)    | -801.4(13)  | 5353.0(9)  | 27.9(3)   |
| N3   | 1744(2)    | 866.0(14)   | 4760.5(9)  | 32.3(4)   |
| N4   | 3546(2)    | 1282.3(13)  | 5745.4(8)  | 26.6(3)   |
| N5   | 5483(2)    | 1589.9(14)  | 6716.2(9)  | 33.1(4)   |
| N6   | 4867.7(17) | -388.8(14)  | 6334.7(8)  | 30.3(4)   |
| C1   | 4036(2)    | -1195.7(16) | 5884.5(10) | 27.3(4)   |
| C2   | 2767(2)    | 440.5(15)   | 5301.0(10) | 25.0(4)   |
| C3   | 4625(2)    | 846.9(16)   | 6263.4(10) | 25.2(4)   |
| N7   | 8716(2)    | 2563.7(13)  | 5692.5(9)  | 36.2(4)   |
| N8   | 9457(2)    | 4479.1(13)  | 6122.2(9)  | 27.3(3)   |
| N9   | 10303(2)   | 6369.2(15)  | 6549.3(9)  | 34.6(4)   |
| N10  | 8360.5(19) | 6268.4(13)  | 5559.9(8)  | 25.9(3)   |
| N11  | 6574(2)    | 6019.6(14)  | 4552.0(9)  | 34.0(4)   |
| N12  | 7583.6(19) | 4252.3(13)  | 5088.3(8)  | 25.6(3)   |
| C4   | 8558(2)    | 3765.1(15)  | 5626.2(10) | 25.2(4)   |
| C5   | 9350(2)    | 5725.3(15)  | 6073.1(9)  | 25.0(4)   |
| C6   | 7518(2)    | 5502.7(15)  | 5082.7(10) | 24.8(4)   |

**Table S3. Anisotropic Displacement Parameters ( $\text{\AA}^2 \times 10^3$ ) for  $(\text{C}_3\text{N}_6\text{H}_7)_2\text{SiF}_6 \cdot \text{H}_2\text{O}$ . The Anisotropic displacement factor exponent takes the form:  $-2\pi^2[h^2a^{*2}U_{11}+2hka^*b^*U_{12}+\dots]$ .**

| Atom | $U_{11}$ | $U_{22}$ | $U_{33}$ | $U_{23}$  | $U_{13}$ | $U_{12}$ |
|------|----------|----------|----------|-----------|----------|----------|
| Si1  | 31.2(3)  | 21.9(3)  | 27.8(3)  | -3.83(18) | -12.2(2) | 0.89(18) |
| F1   | 68.7(9)  | 28.2(6)  | 76.0(10) | 14.5(6)   | -22.9(8) | -11.7(6) |
| F2   | 71.7(10) | 75.4(10) | 39.3(8)  | -24.0(7)  | -19.7(7) | 9.2(8)   |
| F3   | 39.4(7)  | 37.8(7)  | 72.6(10) | 7.1(6)    | -17.1(6) | 9.0(5)   |
| F4   | 61.3(9)  | 55.5(9)  | 62.6(10) | 12.5(7)   | -5.0(7)  | -25.0(7) |
| F5   | 78.9(10) | 47.2(8)  | 35.3(7)  | -12.5(6)  | -5.4(7)  | -0.4(7)  |
| F6   | 46.6(8)  | 70.4(10) | 75.9(11) | -24.4(8)  | -35.0(7) | 23.1(7)  |
| O1   | 58.7(11) | 36.0(9)  | 60.9(11) | 15.8(7)   | -30.8(9) | -12.2(7) |
| N1   | 47.1(10) | 23.2(8)  | 38.1(9)  | 2.1(6)    | -10.7(8) | 5.6(7)   |
| N2   | 32.3(8)  | 22.8(7)  | 28.2(8)  | -0.7(6)   | -6.8(6)  | 1.6(6)   |
| N3   | 37.4(9)  | 24.6(8)  | 34.2(9)  | -0.1(6)   | -13.4(7) | 2.1(6)   |
| N4   | 31.3(8)  | 21.2(7)  | 27.0(8)  | -1.1(6)   | -4.4(6)  | 1.0(6)   |
| N5   | 37.3(9)  | 28.6(8)  | 32.7(9)  | -3.7(6)   | -12.3(7) | 0.8(6)   |
| N6   | 34.1(9)  | 26.0(8)  | 30.4(9)  | 1.5(6)    | -10.6(7) | 3.0(6)   |
| C1   | 30.4(9)  | 25.3(9)  | 26.3(9)  | -1.1(7)   | -0.5(7)  | 1.3(7)   |
| C2   | 24.7(9)  | 23.9(8)  | 26.3(9)  | -1.2(7)   | 0.0(7)   | 1.4(6)   |
| C3   | 27.4(9)  | 26.3(8)  | 21.8(9)  | -0.4(6)   | -1.0(7)  | 1.0(7)   |
| N7   | 52.4(11) | 21.3(8)  | 34.1(9)  | 2.7(6)    | -14.9(8) | -1.6(7)  |
| N8   | 33.2(9)  | 22.9(7)  | 25.4(8)  | 1.3(6)    | -7.6(7)  | 1.4(6)   |
| N9   | 41.8(10) | 28.6(8)  | 32.6(9)  | -3.8(6)   | -14.0(7) | -0.7(6)  |
| N10  | 28.5(8)  | 21.5(7)  | 27.5(8)  | -2.5(6)   | -5.9(6)  | -0.4(5)  |
| N11  | 40.1(9)  | 22.7(8)  | 38.4(9)  | -0.6(6)   | -18.9(7) | 1.3(6)   |
| N12  | 29.4(8)  | 21.9(7)  | 25.2(8)  | -0.9(5)   | -6.3(6)  | -1.2(6)  |
| C4   | 28.6(9)  | 23.5(8)  | 23.3(9)  | 0.2(6)    | 0.1(7)   | -0.8(6)  |
| C5   | 26.9(9)  | 25.9(9)  | 22.0(9)  | -2.4(6)   | -0.9(7)  | 0.1(6)   |
| C6   | 24.1(9)  | 24.2(8)  | 26.2(9)  | 0.0(6)    | -0.7(7)  | -0.2(6)  |



**Table S4. Bond Lengths for (C<sub>3</sub>N<sub>6</sub>H<sub>7</sub>)<sub>2</sub>SiF<sub>6</sub>·H<sub>2</sub>O.**

| Atom Atom Length/Å |    |            | Atom Atom Length/Å |    |          |
|--------------------|----|------------|--------------------|----|----------|
| Si1                | F1 | 1.6771(13) | N5                 | C3 | 1.314(2) |
| Si1                | F2 | 1.6686(14) | N6                 | C1 | 1.346(2) |
| Si1                | F3 | 1.6745(12) | N6                 | C3 | 1.360(2) |
| Si1                | F4 | 1.6666(13) | N7                 | C4 | 1.316(2) |
| Si1                | F5 | 1.6766(13) | N8                 | C4 | 1.360(2) |
| Si1                | F6 | 1.6626(12) | N8                 | C5 | 1.359(2) |
| N1                 | C1 | 1.323(2)   | N9                 | C5 | 1.317(2) |
| N2                 | C1 | 1.323(2)   | N10                | C5 | 1.323(2) |
| N2                 | C2 | 1.360(2)   | N10                | C6 | 1.351(2) |
| N3                 | C2 | 1.321(2)   | N11                | C6 | 1.313(2) |
| N4                 | C2 | 1.346(2)   | N12                | C4 | 1.322(2) |
| N4                 | C3 | 1.323(2)   | N12                | C6 | 1.359(2) |

**Table S5. Bond Angles for (C<sub>3</sub>N<sub>6</sub>H<sub>7</sub>)<sub>2</sub>SiF<sub>6</sub>·H<sub>2</sub>O.**

| Atom Atom Atom Angle/° |     |    |            | Atom Atom Atom Angle/° |     |     |            |
|------------------------|-----|----|------------|------------------------|-----|-----|------------|
| F2                     | Si1 | F1 | 89.44(8)   | N2                     | C1  | N6  | 120.45(16) |
| F2                     | Si1 | F3 | 90.74(8)   | N3                     | C2  | N2  | 117.38(16) |
| F2                     | Si1 | F5 | 178.33(8)  | N3                     | C2  | N4  | 116.74(16) |
| F3                     | Si1 | F1 | 89.28(7)   | N4                     | C2  | N2  | 125.87(16) |
| F3                     | Si1 | F5 | 90.29(8)   | N4                     | C3  | N6  | 120.14(15) |
| F4                     | Si1 | F1 | 178.75(8)  | N5                     | C3  | N4  | 121.13(16) |
| F4                     | Si1 | F2 | 91.43(9)   | N5                     | C3  | N6  | 118.73(16) |
| F4                     | Si1 | F3 | 89.81(7)   | C5                     | N8  | C4  | 119.74(15) |
| F4                     | Si1 | F5 | 89.89(8)   | C5                     | N10 | C6  | 115.50(15) |
| F5                     | Si1 | F1 | 89.25(8)   | C4                     | N12 | C6  | 115.22(15) |
| F6                     | Si1 | F1 | 90.28(8)   | N7                     | C4  | N8  | 117.47(16) |
| F6                     | Si1 | F2 | 88.94(8)   | N7                     | C4  | N12 | 120.88(16) |
| F6                     | Si1 | F3 | 179.45(7)  | N12                    | C4  | N8  | 121.64(15) |
| F6                     | Si1 | F4 | 90.64(8)   | N9                     | C5  | N8  | 117.03(16) |
| F6                     | Si1 | F5 | 90.03(7)   | N9                     | C5  | N10 | 121.45(16) |
| C1                     | N2  | C2 | 115.87(15) | N10                    | C5  | N8  | 121.50(16) |
| C3                     | N4  | C2 | 116.14(15) | N10                    | C6  | N12 | 126.35(16) |
| C1                     | N6  | C3 | 121.51(14) | N11                    | C6  | N10 | 116.71(16) |
| N1                     | C1  | N2 | 120.66(17) | N11                    | C6  | N12 | 116.92(16) |
| N1                     | C1  | N6 | 118.88(17) |                        |     |     |            |

**Table S6. Hydrogen Bonds for (C<sub>3</sub>N<sub>6</sub>H<sub>7</sub>)<sub>2</sub>SiF<sub>6</sub>·H<sub>2</sub>O.**

| D   | H    | A                | d(D-H)/Å  | d(H-A)/Å  | d(D-A)/Å  | D-H-A/° |
|-----|------|------------------|-----------|-----------|-----------|---------|
| O1  | H1C  | F1               | 0.870(17) | 1.874(18) | 2.737(2)  | 171(3)  |
| N6  | H6   | F6 <sup>1)</sup> | 0.791(9)  | 1.979(11) | 2.7418(9) | 162(2)  |
| N7  | H7B  | F5 <sup>1)</sup> | 0.86      | 2.07      | 2.761(2)  | 137.0   |
| N8  | H8   | O1 <sup>2)</sup> | 0.90(3)   | 1.81(3)   | 2.703(2)  | 176(2)  |
| N9  | H9A  | F1 <sup>3)</sup> | 0.86      | 2.01      | 2.763(2)  | 145.3   |
| N11 | H11B | F2 <sup>4)</sup> | 0.86      | 2.02      | 2.756(2)  | 142.5   |

<sup>1)</sup>3/2-X,-1/2+Y,3/2-Z; <sup>2)</sup>1+X,+Y,+Z; <sup>3)</sup>3/2-X,1/2+Y,3/2-Z; <sup>4)</sup>1-X,1-Y,1-Z

## References

- (1) *CrysAlisPro*, Ver. 1.171.36.28; Agilent Technologies: Santa Clara, CA, 2013.
- (2) O. V. Dolomanov, L. J. Bourhis, R. J. Gildea, J. A. K. Howard, H. Puschmann, OLEX2: a complete structure solution, refinement and analysis program. *J. Appl. Cryst.*, 2009, **42**, 339.
- (3) L. J. Bourhis, O. V. Dolomanov, R. J. Gildea, J. A. K. Howard, H. Puschmann, The anatomy of a comprehensive constrained, restrained refinement program for the modern computing environment-Olex2 dissected. *Acta Cryst. A* 2015, **71**, 59.
- (4) G. M. Sheldrick, SHELXT-integrated space-group and crystal-structure determination. *Acta Cryst. C* 2015, **71**, 3.
- (5) S. J. Clark, M. D. Segall, C. J. Pickard, P. J. Hasnip, M. J. Probert, K. Refson, M. C. Payne, First principles methods using CASTEP. *Z. Kristallogr. - Cryst. Mater.*, 2005, **220**, 567.
- (6) M. C. Payne, M. P. Teter, D. C. Allan, T. A. Arias, J. D. Joannopoulos, Iterative minimization techniques for *ab initio* total-energy calculations: molecular dynamics and conjugate gradients. *Rev. Mod. Phys.*, 1992, **64**, 1045.
- (7) D. M. Ceperley, B. J. Alder, Ground-state of the electron-gas by a stochastic method. *Phys. Rev. Lett.*, 1980, **45**, 566.
- (8) J. P. Perdew, A. Zunger, Self-interaction correction to density-functional approximations for many-electron systems. *Phys. Rev. B* 1981, **23**, 5048.
- (9) H. J. Monkhorst, J. D. Pack, Special points for brillouin-zone integrations. *Phys. Rev. B* 1976, **13**, 5188.
